# Supplementary material
Source: PubMed Central journal article supplement (PMC4361387)
Supplement: NIHMS638357-supplement-Supp_FigureS1-S4.pdf [file NIHMS638357-supplement-Supp_FigureS1-S4.pdf]

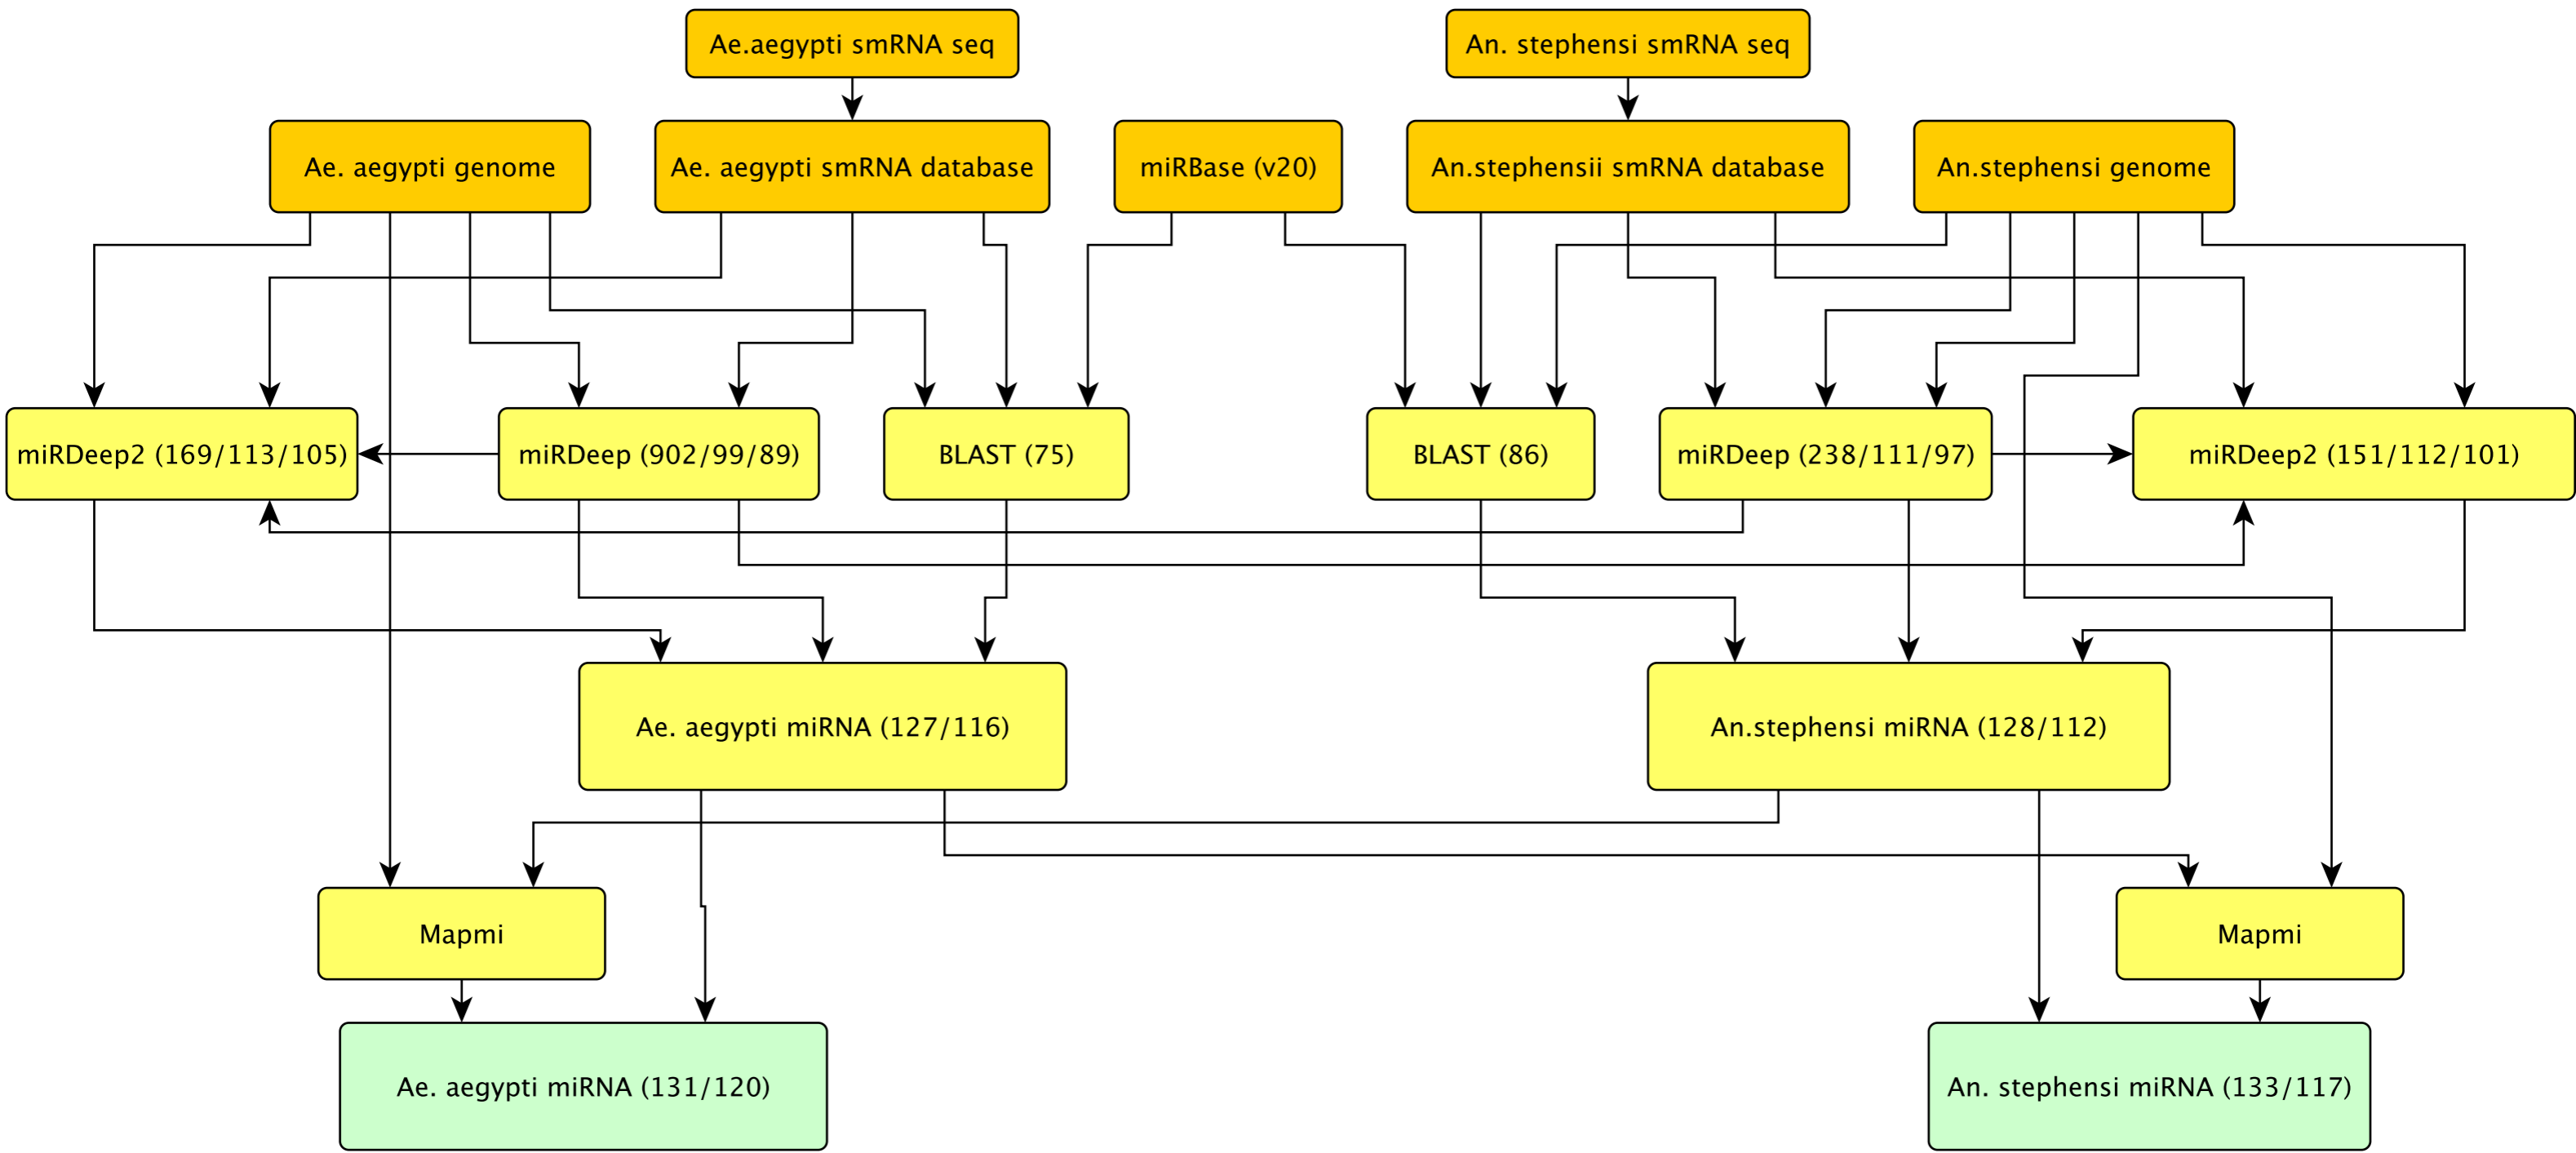

**aae-miR-2941-1**

1CGTGAAGCTCAGCTGCATTACA22, aegyEgg2-4, x30  
1TAGTACGGCTAGAACTCCACGGA25, aegyEgg2-4, x2171, 100%  
1TAGTACGGCTAGAACTCCACGGA23, aegyEgg2-4, x122195  
1TAGTACGGCTAGAACTCCACGGA23, aegyE12-48, x140992  
1TAGTACGGCTAGAACTCCACGGA23, aegyEgg2-4, x165894  
1TAGTACGGCTAGAACTCCACGG22, aegyEgg2-4, x275180  
1TAGTACGGCTAGAACTCCACG21, aegyEgg2-4, x283203  
1TAGTACGGCTAGAACTCCACGGA23, aegyE8-12, x406592  
GAATGGCGATTGTTTCGTGAAGCTCAGCTGCATTACACGATATGGAATACGGTTTGTAGTACGGCTAGAACTCCACGGACATTACATTT  
(((((((((.....)))))))).)))))

**aae-miR-2941-2**

1CGTGGTGTTTAGACGTATTACAT23, aegyE8-12, x10  
1CGTGGTGTTTAGACGTATTAC21, aegyEgg2-4, x14  
1TGATTTTTTGAACATAACTG20, aegyEgg2-4, x17  
1CGTGGTGTTTAGACGTATTA20, aegyE8-12, x27  
1CGTGGTGTTTAGACGTATTACA22, aegyEgg2-4, x80  
1CGTGGTGTTTAGACGTATTACA22, aegyE8-12, x143  
1TAGTACGGCTAGAACTCCACGGAT24, aegyE12-48, x22422, 100%  
1TAGTACGGCTAGAACTCCACGGAT24, aegyE8-12, x23891, 100%  
1TAGTACGGCTAGAACTCCACGGA23, aegyEgg2-4, x122195  
1TAGTACGGCTAGAACTCCACGGA23, aegyE12-48, x140992  
1TAGTACGGCTAGAACTCCACGGA23, aegyEgg2-4, x165894  
1TAGTACGGCTAGAACTCCACGG22, aegyEgg2-4, x275180  
1TAGTACGGCTAGAACTCCACG21, aegyEgg2-4, x283203  
1TAGTACGGCTAGAACTCCACGGA23, aegyE8-12, x406592  
GATTAAGTTGTACCACTTTCGTGGTGTTTAGACGTATTACATGATTTTTTGAACATAACTGTAGTACGGCTAGAACTCCACGGATGTTGGCAATATAGTC  
(((((((((.....)))))))).)))))

A

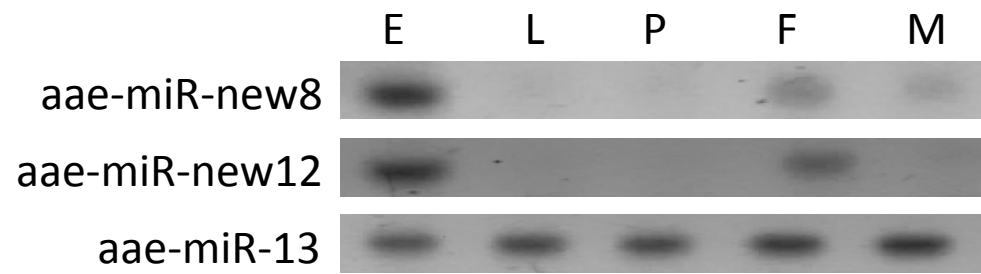

B

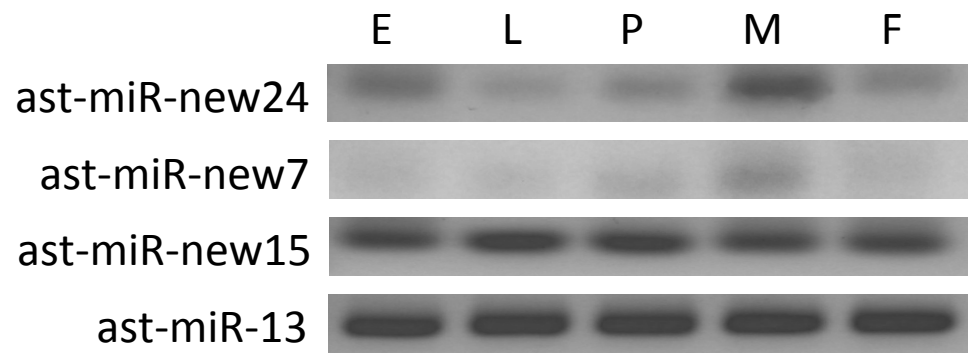

A

```

1ACCCTGTAGATCCGAATTTGTT22, Ste-P, x60, 100%
1CAAATTCGGTTCTAGAGAGGTTT23, Ste-L, x87, 100%
1CAAATTCGGTTCTAGAGAGGTTT23, Ste-F, x139, 100%
1ACCCTGTAGATCCGAATTTGTT22, Ste-M, x140, 100%
1CAAATTCGGTTCTAGAGAGGTTT23, Ste-M, x204, 100%
1ACCCTGTAGATCCGAATTTGTT22, Ste-F, x2976, 100%
1CAAATTCGGTTCTAGAGAGGTTT23, Ste-E, x3534, 100%
1ACCCTGTAGATCCGAATTTGTT22, Ste-M, x10750, 100%
ACCCTGTAGATCCGAATTTGTTTAAATTTAACAAGCGACAAATTCGGTTCTAGAGAGGTTT
(((((((((.....))))))))))..

```

B

```

1CGGAGCAGCTGTGGATCTTGAAC23, Ste-L, x1, 100%
1TGTGGATCTTGAACCCGCGCAAGC24, Ste-L, x1, 100%
1AGCAGCTGTGGATCTTGAACC21, Ste-L, x1, 100%
1AGCAGCTGTGGATCTTGAACCCGC24, Ste-L, x1, 100%
1CCGGAGCAGCTGTGGATCTTGAAC24, Ste-M, x1, 100%
1CCGGAGCAGCTGTGGATCTTGAACC25, Ste-M, x1, 100%
1CGGAGCAGCTGTGGATCTTGAACCCGC27, Ste-P, x1, 100%
1TCTGGAACCTCGATGGCACC21, Ste-L, x2, 100%
CCTCTGGAACCTCGATGGCACC21GAGCAGCTGTGGATCTTGAACCCGCGCAAGCTGCTCACGCGCCAAATCGATCCGGTTGCGGGCA
...((((((.....))))))..

```

C

```

1TGGATACGAGTAACTGACACTG22, aegyE8-12, x6, 100%
4GAGTAACTGACACTGAAGAAGAC26, aegyEgg2-4, x6, 100%
1ATACGAGTAACTGACACTGAAG22, aegyE0-1, x7, 100%
1GTAAGTAACTGACACTGAAGAAGACTG23, aegyEgg2-4, x8, 100%
1TACGAGTAACTGACACTGAAGAAGAC26, aegyE0-1, x11, 100%
1TACGAGTAACTGACACTGAAGAAGAC26, aegyEgg2-4, x61, 100%
1TGGATACGAGTAACTGACACTGAAGAAGAC30, aegyEgg2-4, x91, 100%
GCAGTCTTCTTTCAGTGTCTAGTACTCGGATCCACTAGTGGATACGAGTAACTGACACTGAAGAAGACTGGAG
.(((((((.....))))))..

```
